# Supplementary material for: Mobility Patterns of Scholar Communities in Southwestern European Countries
Source: MDPI journal article supplement (doi:10.3390/su142416704), 2022-12-13
Supplement: s1 [file s1]

## Supplementary Materials

### A. Characterisation of the Studied Schools

**Table S1.** Characteristics of the studied schools from Portugal, Spain, France, and Gibraltar.

| Country   | ID  | City              | Number of Students | Area (m <sup>2</sup> ) | School type    | Answers to Questionnaire |                  |                 |
|-----------|-----|-------------------|--------------------|------------------------|----------------|--------------------------|------------------|-----------------|
|           |     |                   |                    |                        |                | n                        | Success Rate (%) | Technical Audit |
| Portugal  | S1  | Loures            | 590                | 25,222                 | Basic + Middle | 44                       | 7                | Yes             |
|           | S2  | Loures            | 285                | 7799                   | Elementary     | 120                      | 44               | Yes             |
|           | S3  | Loures            | 722                | 22,281                 | Basic + Middle | 324                      | 32               | Yes             |
|           | S4  | Loures            | 742                | 35,842                 | Basic + Middle | 395                      | 53               | Yes             |
|           | S5  | Loures            | 483                | 27,912                 | High           | 44                       | 9                | Yes             |
|           | S6  | Lisbon            | 1772               | 20,393                 | University     | 480                      | 27               | Yes             |
|           | S7  | Matosinhos        | 704                | 6869                   | High           | 237                      | 34               | Yes             |
|           | S8  | Matosinhos        | 166                | 6169                   | Elementary     | 78                       | 47               | Yes             |
|           | S9  | Vila Nova de Gaia | 421                | 15,369                 | Basic + Middle | 306                      | 73               | Yes             |
| Spain     | S10 | La Rinconada      | 160                | 2430                   | Elementary     | 40                       | 25               | Yes             |
|           | S11 | Seville           | 672                | 16,475                 | Elementary     | 104                      | 15               | Yes             |
|           | S12 | La Rinconada      | 706                | 9979                   | Elementary     | 91                       | 13               | Yes             |
|           | S13 | La Rinconada      | 372                | 10,937                 | Elementary     | 96                       | 26               | Yes             |
|           | S14 | Seville           | 950                | 15,787                 | Middle + High  | 137                      | 14               | Yes             |
|           | S15 | Seville           | 486                | 14,823                 | Middle + High  | 244                      | 50               | Yes             |
|           | S16 | Seville           | 759                | 10,891                 | Middle + High  | 55                       | 7                | Yes             |
|           | S17 | Ronda             | 1050               | 16,854                 | Middle + High  | 162                      | 15               | Yes             |
|           | S18 | Bormujos          | 801                | 11,788                 | Middle + High  | -                        | -                | No              |
|           | S19 | Alcalá de Henares | 532                | 3083                   | Middle + High  | 249                      | 47               | Yes             |
|           | S20 | Alcalá de Henares | 225                | 3264                   | Elementary     | 55                       | 24               | Yes             |
|           | S21 | Madrid            | 907                | 14,409                 | Middle + High  | 194                      | 21               | Yes             |
|           | S22 | Madrid            | 360                | 5600                   | Middle + High  | 51                       | 14               | Yes             |
| France    | S23 | La Rochelle       | 1196               | 44,700                 | University     | 277                      | 23               | Yes             |
|           | S24 | La Rochelle       | 581                | 36,969                 | High           | 267                      | 46               | Yes             |
|           | S25 | La Rochelle       | 1715               | 24,999                 | High           | 288                      | 17               | Yes             |
|           | S26 | La Rochelle       | 270                | 8565                   | Elementary     | 42                       | 16               | Yes             |
|           | S27 | La Rochelle       | 272                | 8838                   | Elementary     | 56                       | 21               | Yes             |
|           | S28 | La Rochelle       | 220                | 9489                   | Elementary     | 49                       | 22               | Yes             |
|           | S29 | La Rochelle       | 262                | 9582                   | Elementary     | 34                       | 13               | Yes             |
|           | S30 | La Rochelle       | 252                | 18,075                 | Elementary     | 42                       | 17               | Yes             |
|           | S31 | La Rochelle       | 383                | 10,863                 | Elementary     | 70                       | 18               | Yes             |
| Gibraltar | S32 | Gibraltar         | 212                | -                      | Elementary     | -                        | -                | No              |
|           | S33 | Gibraltar         | 316                | -                      | Middle         | 168                      | 53               | No              |
|           | S34 | Gibraltar         | 469                | -                      | Elementary     | 5                        | 1                | No              |
|           | S35 | Gibraltar         | 392                | -                      | Basic          | -                        | -                | No              |
|           | S36 | Gibraltar         | 1080               | -                      | High           | 204                      | 19               | No              |
|           | S37 | Gibraltar         | 414                | -                      | Basic          | 16                       | 4                | No              |
|           | S38 | Gibraltar         | 930                | -                      | High           | -                        | -                | No              |
|           | S39 | Gibraltar         | 289                | 7468                   | University     | -                        | -                | Yes             |

### ***B. Behavioural Questionnaire Applied to Scholar Community***

1. Age
2. Do you travel to the school by foot?
  - 2.1. If yes, indicate the time, in minutes you spend going from your home to school.
3. Do you travel to the school by bicycle?
  - 3.1. If yes, indicate the time, in minutes you spend going from your home to school.
4. Do you travel to the school by bus?
  - 4.1. If yes, indicate the time, in minutes you spend going from your home to school.
5. Do you travel to the school by subway?
  - 5.1. If yes, indicate the time, in minutes you spend going from your home to school.
6. Do you travel to the school by train?
  - 6.1. If yes, indicate the time, in minutes you spend going from your home to school.
7. Do you travel to the school by tram?
  - 7.1. If yes, indicate the time, in minutes you spend going from your home to school
8. Do you travel to the school by boat?
  - 8.1. If yes, indicate the time, in minutes you spend going from your home to school.
9. Do you travel to the school by car?
  - 9.1. If yes, indicate the time, in minutes you spend going from your home to school.
10. Do you travel to the school by motorcycle?
  - 10.1. If yes, indicate the time, in minutes you spend going from your home to school.
11. Do you practice car sharing when you travel to the school? If yes, how many passengers go to your school with you?
12. Do you go back to your home and return to school more than once per day?
13. What is the distance between your home and school?
14. How much do you spend on your trips home—school, using car or motorcycle each month?
15. How much do you spend on your trips home—school using public transports each month?
  - 15.1. If there was a bike path between your home and the school, would you rather the bike?
16. Do you use the public transport when you go out with your family on the weekends?

### ***C. Checklist of the Technical Audit***

| A—Administrative area      |                                                        |                                                   |
|----------------------------|--------------------------------------------------------|---------------------------------------------------|
| A1.                        | Name of the school                                     |                                                   |
| A2.                        | Type of school                                         |                                                   |
| A3.                        | Age range of students                                  |                                                   |
| A4.                        | Country                                                |                                                   |
| A5.                        | City                                                   |                                                   |
| A6.                        | Address                                                |                                                   |
| A7.                        | Contact person                                         |                                                   |
| A8.                        | General photo of the school                            |                                                   |
| B—Physical characteristics |                                                        | Data to request                                   |
| B1.                        | Year of construction                                   |                                                   |
| B2.                        | Total school area (m <sup>2</sup> ) (A × B)—see figure | 1—Architecture project<br>(building's blueprints) |
| B3.                        | Gross floor area (m <sup>2</sup> ) (C)—see figure      |                                                   |

|                                   |                                                                                                                                                               |
|-----------------------------------|---------------------------------------------------------------------------------------------------------------------------------------------------------------|
| B4.                               | Usable floor area (m <sup>2</sup> ) (C + D) – see figure                                                                                                      |
| B5.                               | Number of floors                                                                                                                                              |
| B6.                               | Number of classrooms                                                                                                                                          |
| B7.                               | Canteen (Y/N)                                                                                                                                                 |
| B8.                               | Gymnasium (Y/N)                                                                                                                                               |
| B8.1.                             | Gymnasium's covered area (m <sup>2</sup> )                                                                                                                    |
| B9.                               | Provide the description (year, type) of any recent renovations, e.g., heating, cooling, ventilation, and air conditioning and refrigeration (HVAC&R) systems: |
| C – Use of the classroom building |                                                                                                                                                               |
| C1.                               | Number of occupants                                                                                                                                           |
| C1.1.                             | Students                                                                                                                                                      |
| C1.2.                             | Teachers                                                                                                                                                      |
| C1.3.                             | Administrative Staff                                                                                                                                          |
| C1.4.                             | Auxiliary Staff                                                                                                                                               |
| C2.                               | Number of occupants per classroom                                                                                                                             |
| C3.                               | Number of canteen users/day                                                                                                                                   |
| C4.                               | Classroom building utilisation period (open and close time)                                                                                                   |
| C4.1.                             | Week                                                                                                                                                          |
| C4.2.                             | Weekend                                                                                                                                                       |
| C5.                               | Yearly closure periods                                                                                                                                        |
| C5.1.                             | Which energy-using equipment are in operation during the closure period?                                                                                      |
| D – Transports                    |                                                                                                                                                               |
| D1.                               | Parking area                                                                                                                                                  |
| D1.1.                             | # of parking spaces at school or periphery within a 100 m radius                                                                                              |
| D1.2.                             | # of parking spaces for disabled at school or periphery within a 100 m radius                                                                                 |
| D1.3.                             | # of parking spaces for electric cars at school or periphery within a 100 m radius                                                                            |
| D1.4.                             | # of parking spaces for bicycles at school or periphery within a 100 m radius                                                                                 |
| D1.5.                             | Photo of the parking area                                                                                                                                     |
| D2.                               | Characterisation of the transport network                                                                                                                     |
| D2.1.                             | Bus                                                                                                                                                           |
| D2.1.1.                           | # of bus stops within a 500 m radius                                                                                                                          |
| D2.1.2.                           | # of bus stops within a 1000 m radius                                                                                                                         |
| D2.1.3.                           | Daily average frequency of passing buses per hour                                                                                                             |
| D2.1.4.                           | Daily average frequency of passing buses per rush hour                                                                                                        |
| D2.1.5.                           | Distance between the nearest stop and school                                                                                                                  |
| D2.1.6.                           | Define rush hour period and duration for bus usage                                                                                                            |
| D2.1.7.                           | What is the opening and closure time for bus service?                                                                                                         |
| D2.2.                             | Subway                                                                                                                                                        |
| D2.2.1.                           | # of subway stops in a 500 m radius                                                                                                                           |
| D2.2.2.                           | # of subway stops in a 1000 m radius                                                                                                                          |
| D2.2.3.                           | Daily average frequency of passing trains passing per hour                                                                                                    |
| D2.2.4.                           | Daily average frequency of passing trains per rush hour                                                                                                       |

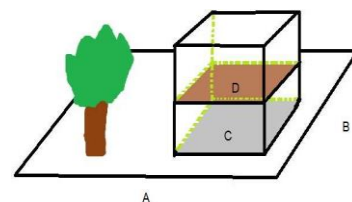

|         |                                                         |
|---------|---------------------------------------------------------|
| D2.2.5. | Distance between the nearest stop and school            |
| D2.2.6. | Define rush hour period and duration for subway usage   |
| D2.2.7. | What's the opening and closure time for subway service? |
| D2.3.   | Train                                                   |
| D2.3.1. | # of train stops in a 500 m radius                      |
| D2.3.2. | # of train stops in a 1000 m radius                     |
| D2.3.3. | Daily average frequency of passing trains per hour      |
| D2.3.4. | Daily average frequency of passing trains per rush hour |
| D2.3.5. | Distance between the nearest stop and school            |
| D2.3.6. | Define rush hour period and duration for train usage    |
| D2.3.7. | What is the opening and closure time for train service? |
| D2.4.   | Tram                                                    |
| D2.4.1. | # of tram stops in a 500 m radius                       |
| D2.4.2. | # of tram stops in a 1000 m radius                      |
| D2.4.3. | Daily average frequency of passing trams per hour       |
| D2.4.4. | Daily average frequency of passing trams per rush hour  |
| D2.4.5. | Distance between the nearest stop and school            |
| D2.4.6. | Define rush hour period and duration for tram usage     |
| D2.4.7. | What is the opening and closure time for tram service?  |
| D2.5.   | Boat                                                    |
| D2.5.1. | # of boat stops in a 500 m radius                       |
| D2.5.2. | # of boat stops in a 1000 m radius                      |
| D2.5.3. | Daily average frequency of passing boats per hour       |
| D2.5.4. | Daily average frequency of passing boats per rush hour  |
| D2.5.5. | Distance between the nearest stop and school            |
| D2.5.6. | Define rush hour period and duration for boat usage     |
| D2.5.7. | What is the opening and closure time for boat service?  |
| D3.     | Observations/comments on transports:                    |
